# Supplementary material for: Integration of Arabidopsis thaliana stress-related transcript profiles, promoter structures, and cell-specific expression
Source: PubMed Central journal article supplement (PMC1896000; doi:10.1186/gb-2007-8-4-r49), 2007-04-04
Supplement: gb-2007-8-4-r49-S1.pdf [file gb-2007-8-4-r49-S1.pdf]

|                                           | Treatment (or Tissue)                              | Treatment Conditions                                            | Number of Time Points | TAIR Submission Number |
|-------------------------------------------|----------------------------------------------------|-----------------------------------------------------------------|-----------------------|------------------------|
| Abiotic Stresses (from Weigle World [83]) |                                                    |                                                                 |                       |                        |
|                                           | Cold                                               | 4 °C                                                            | 12                    | ME00325                |
|                                           | Osmotic                                            | 300 mM Mannitol                                                 | 12                    | ME00327                |
|                                           | Salt                                               | 150 mM Salt                                                     | 12                    | ME00328                |
|                                           | Drought                                            | 15 min. dry air stream                                          | 12                    | ME00338                |
|                                           | Oxidative                                          | 10 µM Methyl Viologen                                           | 12                    | ME00340                |
|                                           | Wounding                                           | Punctured with pins                                             | 14                    | ME00330                |
| Hormone (from TAIR [85])                  |                                                    |                                                                 |                       |                        |
|                                           | ABA                                                | 10 µM ABA                                                       | 3                     | ME00333                |
|                                           | 1-Aminocyclopropane-1-carboxylic Acid (ACC)        | 10 µM ACC                                                       | 3                     | ME00334                |
|                                           | Methyl Jasmonate (MeJA)                            | 10 µM MeJA                                                      | 3                     | ME00337                |
| Elicitors (from TAIR [85])                |                                                    |                                                                 |                       |                        |
|                                           | Ca                                                 | 1mM CaCl <sub>2</sub> + 2.5 mM MgCl <sub>2</sub>                | 2                     | ME00332                |
|                                           | GST                                                | 1 µM GST                                                        | 2                     |                        |
|                                           | Hairpin Z (hrpz)                                   | 10 µM hrpz                                                      | 2                     |                        |
|                                           | GST-Necrosis-Inducing Phytophthora Protein 1 (npp) | 1 µM npp                                                        | 2                     |                        |
|                                           | Flagellin (flg)                                    | 1 µM Flg22                                                      | 2                     |                        |
|                                           | Lipopolysaccharide (lps)                           | 100 µg/ml LPS                                                   | 2                     |                        |
| Biotic Stresses (from TAIR [85])          |                                                    |                                                                 |                       |                        |
|                                           | PstDC 3000                                         | <i>Pseudomonas syringae</i> pv. tomato DC3000 10e8 cfu/ml       | 3                     | ME00331                |
|                                           | Pstavrrpm                                          | <i>Pseudomonas syringae</i> pv. tomato avrRpm1 10e8 cfu/ml      | 3                     |                        |
|                                           | Psthrcc                                            | <i>Pseudomonas syringae</i> pv. tomato DC3000 hrcC- 10e8 cfu/ml | 3                     |                        |
|                                           | Pstpshp                                            | <i>Pseudomonas syringae</i> pv. Phaseolicola 10e8 cfu/ml        | 3                     |                        |
|                                           | Botrytis                                           | <i>Botrytis cinerea</i> 5e5 spores/ml                           | 2                     | ME00341                |
|                                           | <i>E. orontii</i>                                  | <i>Erysiphe orontii</i>                                         | 6                     | ME00354                |
|                                           | Phytophthora                                       | <i>Phytophthora infestans</i> 1e6 spores/ml                     | 3                     | ME00342                |
| Light Treatments (from TAIR [85])         |                                                    |                                                                 |                       |                        |
|                                           | AL, AS                                             | UV-A light                                                      | 2                     | ME00345                |
|                                           | BL, BS                                             | blue light                                                      | 2                     |                        |
|                                           | FL, FS                                             | far-red light                                                   | 2                     |                        |
|                                           | PL, PS                                             | red light (pulse)                                               | 2                     |                        |
|                                           | RL, RS                                             | red light                                                       | 2                     |                        |
|                                           | UL, US                                             | UV-A/B light                                                    | 2                     |                        |
|                                           | WL, WS                                             | white light                                                     | 2                     |                        |

Supplemental Table 1 Continued

|                                    | Treatment (or Tissue)     | Treatment Conditions                   | Number of Time Points | TAIR Submission Number |
|------------------------------------|---------------------------|----------------------------------------|-----------------------|------------------------|
| Chemicals (from TAIR [85])         |                           |                                        |                       |                        |
|                                    | ARR22-ox t-zeatin         | 10 $\mu$ M t-zeatin on ARR22-ox plants | 1                     | ME00356                |
|                                    | 2,3,5-triiodobenzoic acid | 10 $\mu$ M 2,3,5-triiodobenzoic acid   | 1                     | ME00358                |
|                                    | AgNO <sub>3</sub>         | 10 $\mu$ M AgNO <sub>3</sub>           | 1                     | ME00360                |
|                                    | cycloheximide             | 10 $\mu$ M cycloheximide               | 1                     | ME00361                |
| Root Data Set (from AREX [18, 19]) |                           |                                        |                       |                        |
|                                    | Lateral Root Cap          |                                        | 1                     |                        |
|                                    | Epidermis                 |                                        | 1                     |                        |
|                                    | Ground tissue             |                                        | 1                     |                        |
|                                    | Endodermis                |                                        | 1                     |                        |
|                                    | Stele                     |                                        | 1                     |                        |
|                                    | Stage1                    |                                        | 1                     |                        |
|                                    | Stage2                    |                                        | 1                     |                        |
|                                    | Stage3                    |                                        | 1                     |                        |

**Note:**

For more details of the treatments, please refer to the AtGenExpress webpage at TAIR [85] or AREX [18, 19].
